# Supplementary material for: Farmers climate change perception and adaptation responses in Cameroon
Source: Research Square preprint supplement (doi:10.21203/rs.3.rs-7923467/v1), 2025-11-20

**Supplementary Table S1:** Interpretation of Weighted Proportion Scale and Consensus Index

| **Table 1:** Interpretation of WPS scale | | |
| --- | --- | --- |
| **Magnitude** | **Range** | **Interpretation** |
| **Weighted Proportion Score (WPS)** | | |
| Indistinct | −0.1 < *w* < +0.1 | Neutral or no clear collective perception |
| Perceptible | +0.1 ≤ *w* < +0.5 or −0.5 < *w* ≤ −0.1 | Non-significant perception of increase/decrease |
| Considerable | +0.5 ≤ *w* < +1.0 or −1.0 < *w* ≤ −0.5 | Significant perception of increase/decrease |
| Overwhelming | +1.0 ≤ *w* < +2.0 or −2 < *w* ≤ −1.0 | Very strong perception of increase/decrease |
| **Consensus Index (CI)** | | |
| Low confidence | 0.0 ≤ *c* < 0.4 | Weak consensus; high variability in responses |
| Modest confidence | 0.4 ≤ *c* < 0.6 | Moderate agreement; some variability in perceptions |
| High confidence | 0.6 ≤ *c* < 0.8 | Strong agreement; low variability in perceptions |
| Very high confidence | 0.8 ≤ *c* ≤ 1.0 | Near-unanimous consensus; consistent perception |
| *w*: weighted proportion score (WPS) value; *c*: consensus index (CI) value | | |

**Supplementary Figure S2:** Pearson correlation between predictor and outcome variables in the Heckman model


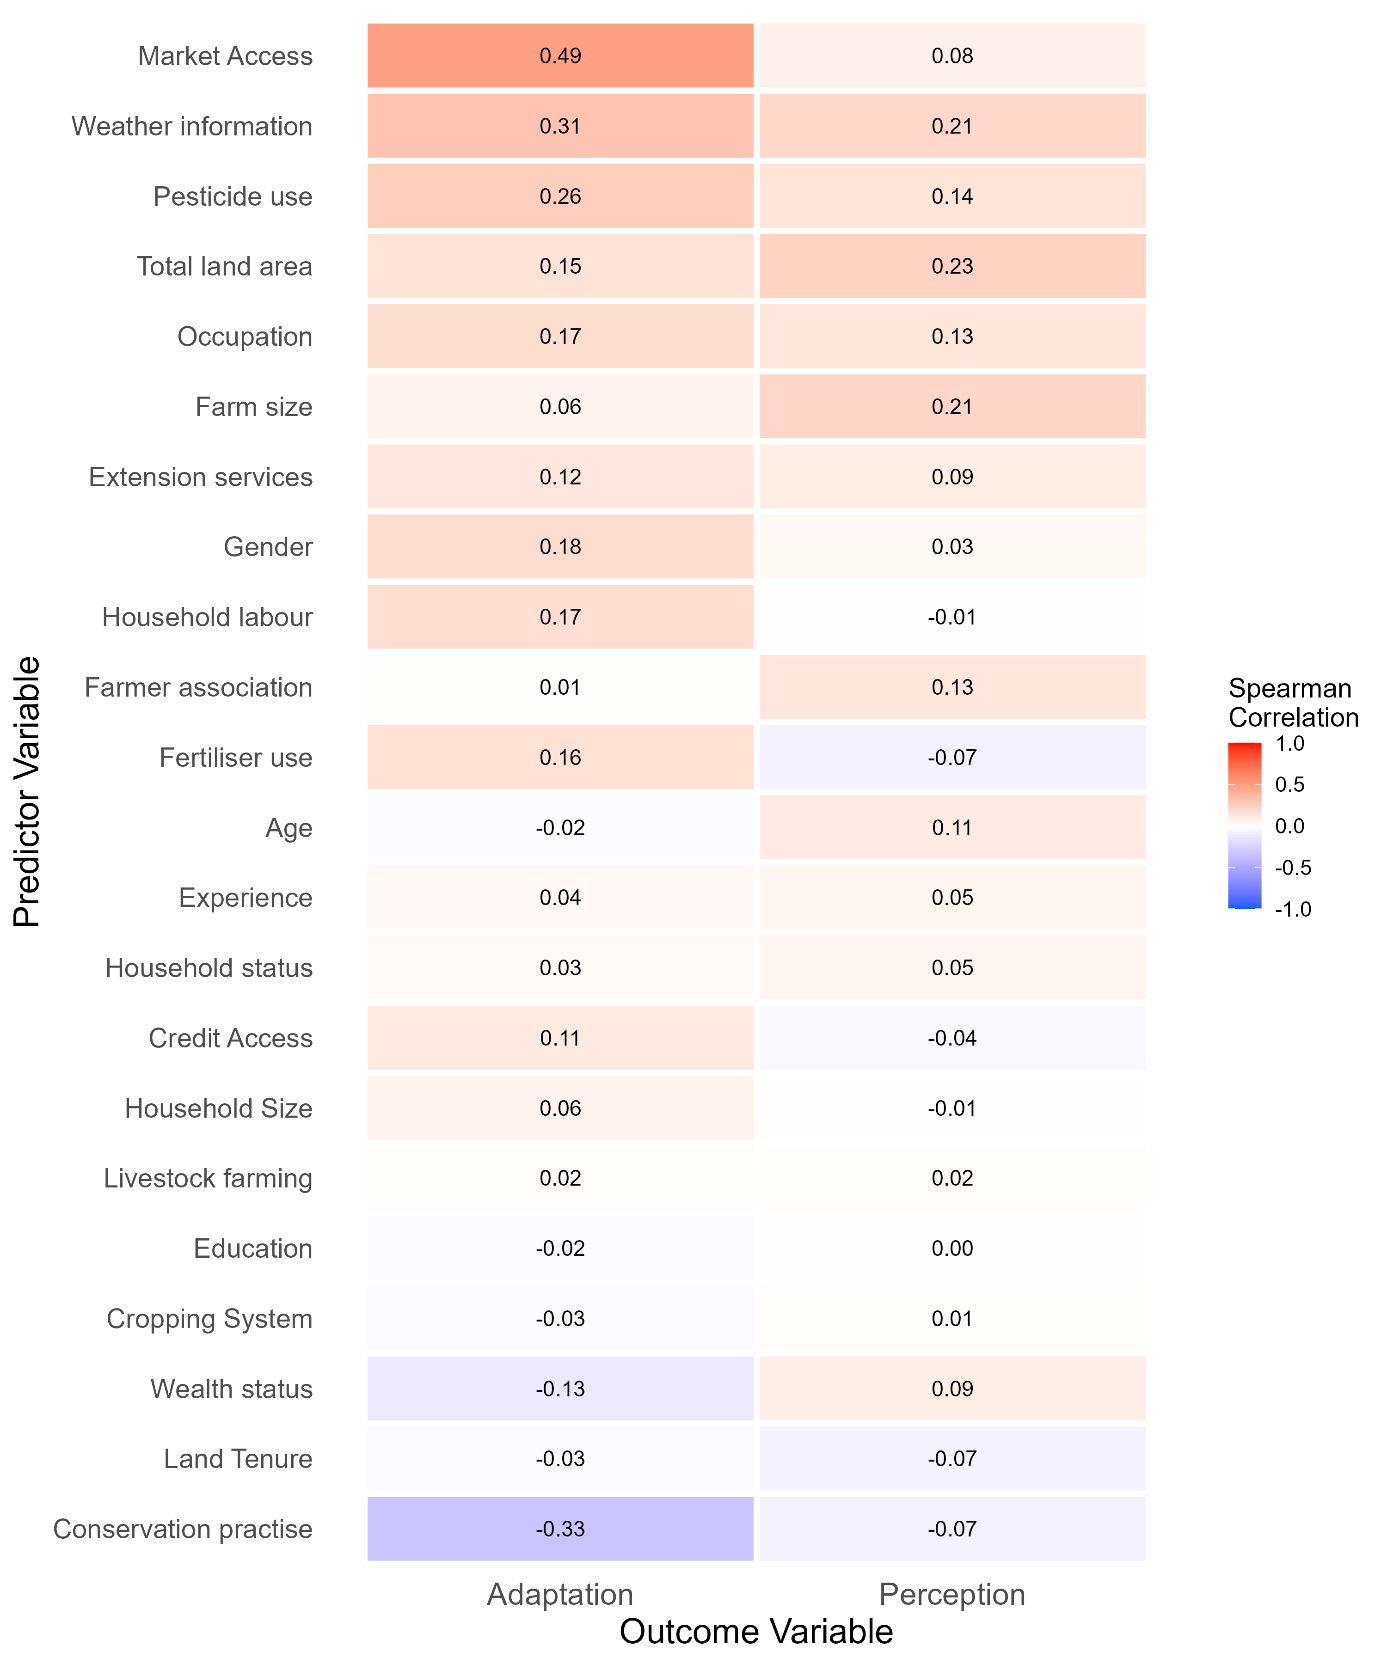


**Supplementary Table S3:** Variance Inflation Factor check of Heckman selection model

| Variables | Outcome (adaptation) | Selection (perception) |
| --- | --- | --- |
| ***Socioeconomic characteristics*** |  |  |
| Age bracket | 2.183 | 1.876 |
| Education | 1.360 | 1.255 |
| Gender | 2.694 | 1.226 |
| Household status | 2.872 | - |
| Occupation | 1.357 | - |
| Wealth status | 1.433 | - |
| Household size | - | 1.062 |
| Household labour | 1.187 | - |
| Total land | 1.394 | - |
| Land tenure | 1.182 | - |
| ***Farming attributes*** |  |  |
| Experience | 1.805 | 1.662 |
| Farm size | 1.151 | - |
| Cropping system | 1.178 | 1.190 |
| Fertilizer use | 1.623 | 1.553 |
| Pesticide use | 1.462 | 1.476 |
| Conservation | 1.400 | - |
| Livestock farming | 1.199 | - |
| ***Institutional factors*** |  |  |
| Access to extension services | 1.486 | 1.237 |
| Farmer association membership | 1.406 | 1.232 |
| Access to weather information | 1.251 | - |
| Access to credit | 1.091 | - |
| Access to market | 1.364 | - |
| ***Agroecological zone*** | 1.771 | 1.414 |

**Supplementary File S4:** Annual climate trends between 2000 and 2023 using MK and Sen’s slope tests

a. Annual Rainfall (mm)


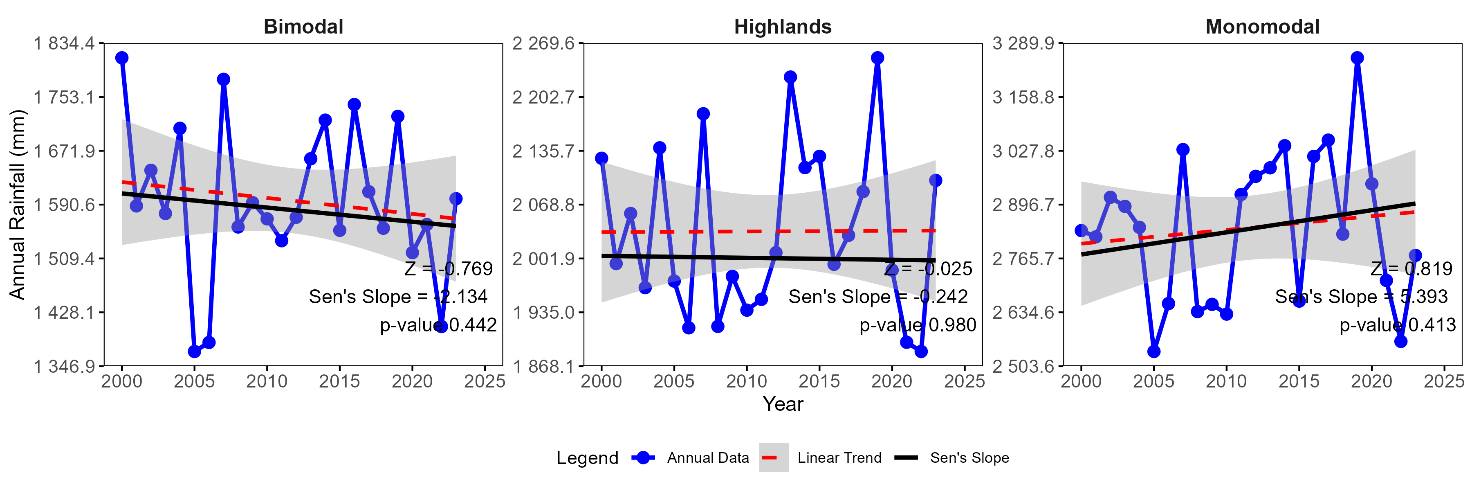


b. Annual Minimum temperature (oC)


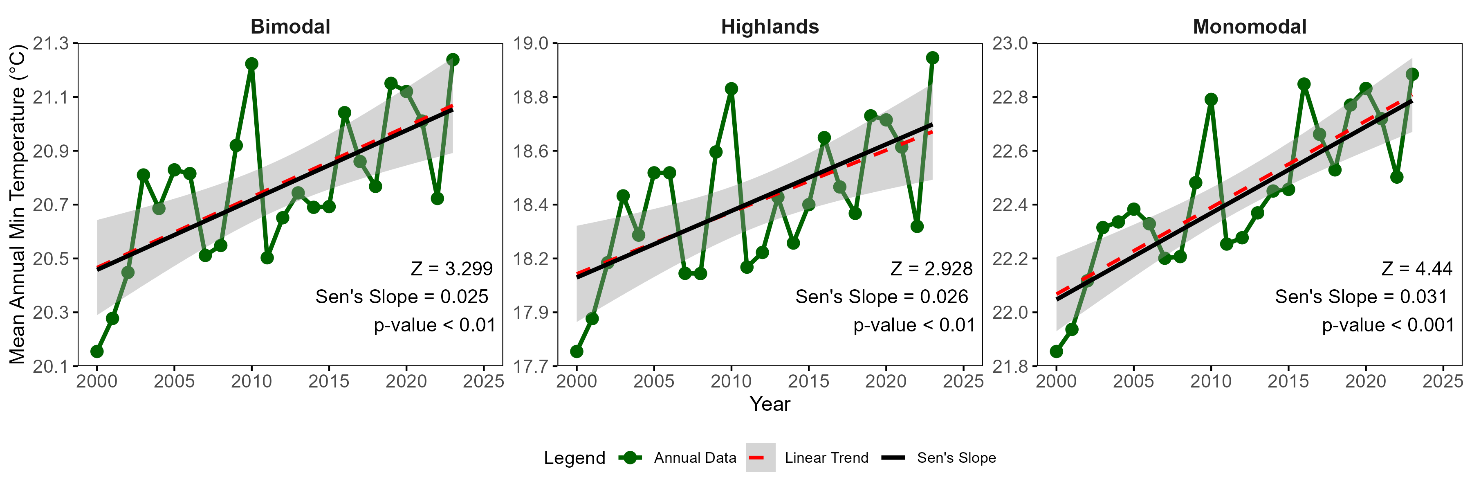


c. Annual Mean temperature (oC)


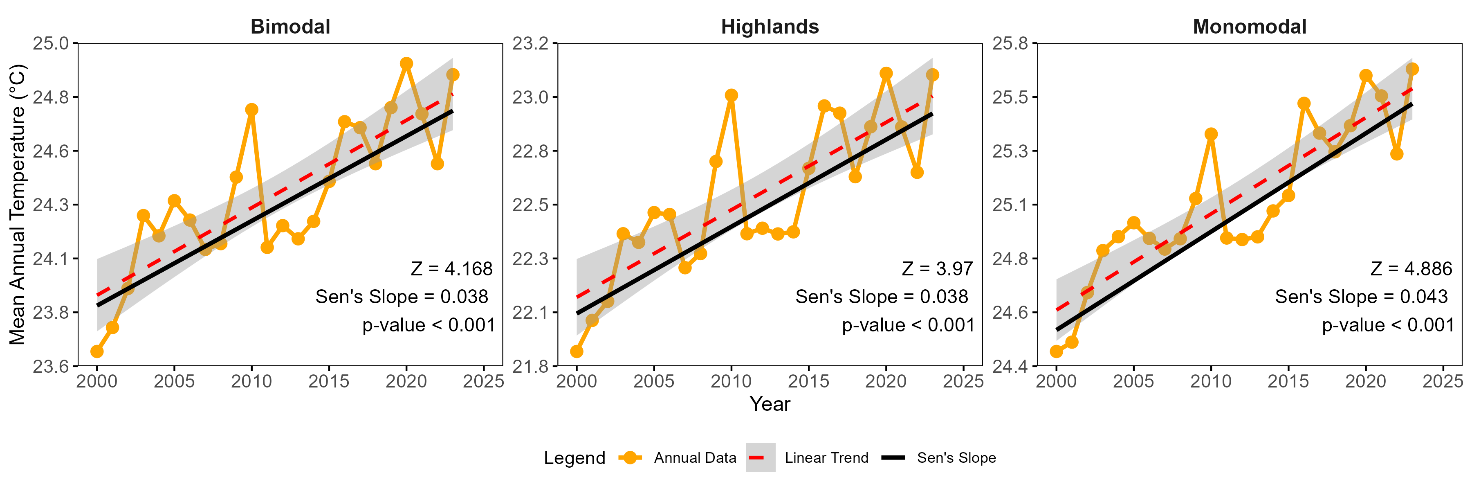


d. Annual Maximum temperature (oC)


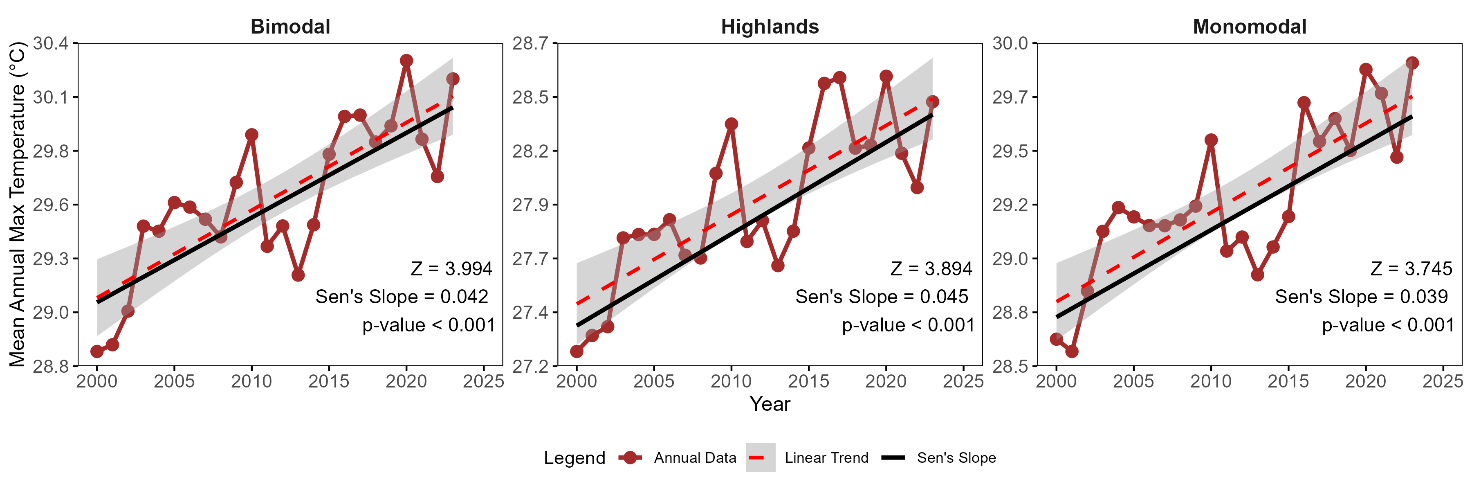

Supplement: Supplementary file 1 [file b9ca558c387e71e7adf73889.docx]
